# Supplementary material
Source: PubMed Central journal article supplement (PMC6301100)

## 1 SUPPLEMENTAL METHODS

2 **Bacteria Preparation.** Bacterial strains were grown overnight at 37°C in tryptic soy  
3 broth, diluted to 1:100 in tryptic soy broth next day, and subculture for 3-4 hours to the  
4 mid-logarithmic phase. *S. aureus* strains were harvested by centrifuging the culture at  
5 9000 rpm for 2 minutes, washed twice, and re-suspended in phosphate buffered saline  
6 (PBS) to achieve an optical density of 0.5.

7 **THP-1 cells and FAM-FLICA caspase-1 assay.** THP-1 (#thp-null) and THP-1 cells  
8 overexpressing *Nlrc4* (#thp-nlrc4) were obtained from Invivogen. Culture and maintenance  
9 of cells was performed as described in their protocols. The FAM-FLICA caspase-1 assay  
10 was performed in THP-1 cells to detect active caspase-1 according to kit's protocol  
11 (ImmunoChemistry Technologies)

12 **Cytokine/Chemokines, LDH, and ROS.** Human (IL-1 $\beta$ , IL-18 and IL-17A) and Mouse  
13 (IL-1 $\beta$ , IL-1 $\alpha$ , IL-18, TNF- $\alpha$ , IL-6, MCP-1, IL-17A, and IL-17F) were measured by ELISA  
14 as described in their respective protocols (eBioscience/Invitrogen). CXCL1, CXCL2,  
15 CXCL5, G-CSF (R&D systems) and HMGB-1 (Chondrex) were quantified according to  
16 the manufacturers' protocols. LDH release and % cytotoxicity assays were performed as  
17 per manufacturer's guidelines (Promega). The percentage cytotoxicity was calculated as  
18 100x (Experimental-Spontaneous)/ (Maximum-Spontaneous). Total ROS activity was  
19 determined using a commercial kit (AAT Bioquest). In some experiments, cells were  
20 infected in the presence or absence of murine recombinant IL-17A (R&D Systems).

21 **BMDM/BMDN, bacterial killing assay, and phagocytosis.** Bone marrow-derived cells  
22 were flushed from tibia and femurs of mice, RBCs lysed, cells were then washed and  
23 resuspended in the DMEM containing 10% FBS and Penicillin/Streptomycin (100 U/ml).

24 Bone marrow cells were then differentiated to macrophages in culture dishes by  
25 supplementing MCSF (50 ng/ml) on days 0, 2, 4, 6 for a week. The Mouse Neutrophil  
26 Enrichment Kit (Stem Cell) was used to isolate and purify neutrophils through negative  
27 selection as described in the manufacturer's protocol. The intracellular killing abilities of  
28 BMDM/Ns were evaluated using a gentamicin protection assay with slight modifications  
29 <sup>1</sup>. Briefly, BMDMs were infected with multiplicity of infection (MOI 10) of *S. aureus* for  
30 1 hour, washed, incubated with a medium containing gentamicin (250 µg/ml) for 2 hours,  
31 washed, and thereafter incubated with a medium containing gentamicin (50 µg/ml) to kill  
32 extracellular bacteria. For BMDNs, a medium containing gentamicin (250 µg/ml) was  
33 used for 30 minutes at indicated times. The cells were then washed, lysed, and plated by  
34 serial dilution in TSA plates to enumerate the CFU of intracellular bacteria. Net  
35 phagocytosis of neutrophils was performed utilizing pHrodo Red *S. aureus* BioParticles  
36 (Life Technologies). Net phagocytosis was calculated by deducting the average  
37 fluorescence intensity of the no-cell negative-control wells from all positive control and  
38 experimental wells.

39 ***In vitro* stimulation of purified  $\gamma\delta$  T cells.** Naïve  $\gamma\delta$  T cells were purified from spleens of  
40 uninfected WT and *Nlrc4*<sup>-/-</sup> mice using pan-T-cell isolation (MAC Miltenyi Biotec)  
41 followed by FACS sorting for CD3<sup>+</sup>  $\gamma\delta$ -TCR<sup>+</sup> cells, as described elsewhere <sup>2</sup>. Purified  $\gamma\delta$   
42 T cells ( $1 \times 10^5$  cells/well) were then stimulated with *S. aureus* (MOI of 10) for 18 hours  
43 in presence or absence of IL-23 (40 ng/ml) (R&D systems). Cell supernatants were  
44 collected and IL-17A was quantitated by ELISA. The purity of  $\gamma\delta$  T cells was found to be  
45  $\geq 87\%$  as determined by flow cytometry.

46 **BrdU staining.** The BrdU Flow Kit (BD Biosciences, #559619) was used. In brief, WT

47 and *Nlrc4*<sup>-/-</sup> mice received a single dose of 1 mg BrdU solution intraperitoneally 1 hour  
48 before infection. Lungs were harvested and processed for flow cytometric staining  
49 according to the manufacturer's protocol.

50 **Human Neutrophils.** Purified human neutrophils (Astarte Biologics, #1025-3841MA18)  
51 were thawed and stimulated with *S. aureus* (MOI 10 or 20), and supernatants were  
52 collected for IL-17A measurement.

53

#### 54 **SUPPLEMENTAL REFERENCES**

- 55 1. Batra S, Cai S, Balamayooran G, Jeyaseelan S. Intrapulmonary administration  
56 of leukotriene B(4) augments neutrophil accumulation and responses in the  
57 lung to Klebsiella infection in CXCL1 knockout mice. *J Immunol* 2012; **188**(7):  
58 3458-3468.  
59
- 60 2. Maher BM, Mulcahy ME, Murphy AG, Wilk M, O'Keeffe KM, Geoghegan JA *et al.*  
61 Nlrp-3-driven interleukin 17 production by gammadeltaT cells controls  
62 infection outcomes during Staphylococcus aureus surgical site infection. *Infect*  
63 *Immun* 2013; **81**(12): 4478-4489.  
64

65

66

67

68

69

70

71 **SUPPLEMENTAL FIGURE LEGENDS**

72 **Supplemental Figure 1. *S. aureus* activates NLRC4 through PKC- $\delta$  to induce IL-1 $\beta$ ,**  
73 **IL-18, and necroptosis. (a)** Immunoblot analysis of NLRC4 in lungs lysates from healthy  
74 and pneumonic patients or from THP-1 and HL-60 cells infected with *S. aureus* (MOI 10)  
75 or PBS for 8 hours. **(b)** % of FLICA+ THP-1 and THP1-NLRC4 cells infected with *S.*  
76 *aureus* (MOI 50) or PBS for 6 hours. **(c)** Immunoblot analysis of NLRC4 in lysates of WT  
77 and *Nlrc4*<sup>-/-</sup>-BMDMs infected with *S. aureus* (MOI 10) for 6 hours. **(d)** Level of IL-1 $\beta$  in  
78 the supernatant of WT and *Nlrc4*<sup>-/-</sup>-BMDMs incubated with *S. aureus* (MOI 20 or 50) or  
79 purified  $\alpha$ -hemolysin (25  $\mu$ g/ml) for 6 hours. **(e)** Level of IL-1 $\beta$  in supernatant of WT-  
80 BMDM infected with *S. aureus* for 12 hours with or without 1 hour pre-treatment with 10  
81  $\mu$ M Rottlerin. **(f)** Cytotoxicity in BMDMs, stimulated with *S. aureus* (MOI 100) for 2 hours  
82 with or without 1 hour pre-treatment with 100  $\mu$ M of Necrostatin-1. **(g)** Representative  
83 immunofluorescence images and **(h)** percentages showing co-expression of RIP3 (green)  
84 and phospho-MLKL (red) in BMDMs stimulated with *S. aureus* (MOI 50) or PBS for 12  
85 hours. Nuclei were stained with DAPI (blue). Original magnification, 40x. **(i-k)** WT and  
86 *Nlrc4*<sup>-/-</sup> mice were inoculated with *S. aureus* ( $5 \times 10^7$  CFU/mouse) and BALF was collected  
87 at 12 and 24 hpi. **(i)** Relative fluorescence units (RFUs) representing LDH release, **(j)** high  
88 mobility group box-1 (HMGB-1), **(k)** IL-1 $\alpha$  are measured in BALF. (n= 4-6 mice /  
89 pneumonia group, n=3 mice/control group). Data from a representative experiment are  
90 shown. All experiments were performed three times. *In vitro* experiments have at least four  
91 biological replicates. Statistical significance was determined by unpaired t-test in all  
92 experiment except in cell death assay **(f)**, by one-way ANOVA (followed by Bonferroni's

93 *post hoc* comparisons). \* $p < 0.05$ ; \*\* $p < 0.01$ . *Hla*:  $\alpha$ -hemolysin, MOI: multiplicity of  
94 infection, DMSO: dimethyl sulfoxide, LDH: Lactate Dehydrogenase.

95 **Supplemental Figure 2. Cytokine/Chemokine profiles of *Nlrc4*<sup>-/-</sup> mice in *S. aureus***  
96 **pneumonia. (a-g)** WT and *Nlrc4*<sup>-/-</sup> mice were inoculated intratracheally with  $5 \times 10^7$  CFU  
97 of *S. aureus* or PBS (control). BALF and organs were harvested at the designated time  
98 points. Control mice (PBS treated) were sacrificed at 24 hpi. (n= 4-6/group for pneumonia  
99 and n=3/group for PBS control). Data are representative of three independent experiments.  
100 \* $p < 0.05$ , \*\*\* $p < 0.001$  by unpaired t-test.

101 **Supplemental Figure 3. NLRC4 deficiency does not alter phagocytosis or bacterial**  
102 **killing of BMDMs in response to *S. aureus*.** (a) BMDMs were isolated from wild type  
103 and *Nlrc4*<sup>-/-</sup> mice and infected with *S. aureus* (MOI 10). The intracellular killing ability of  
104 macrophages was assessed at the indicated time points by determining the intracellular  
105 bacterial burden. Data are representative of three independent experiments with five  
106 technical replicates per group.

107 **Supplemental Figure 4. Multiple immune cell types produce IL-17A in the lungs**  
108 **during *S. aureus* pneumonia. (a-d)** Flow cytometric analysis of lungs from WT and  
109 *Nlrc4*<sup>-/-</sup> mice either untreated or intratracheally infected with  $5 \times 10^7$  CFU of *S. aureus*. At  
110 24 hpi, lungs were harvested and processed for flow cytometric analysis. (a) Dot plots  
111 representation of neutrophils (Ly6G<sup>+</sup> CD11b<sup>+</sup> cells) and IL-17A<sup>+</sup> neutrophils, (b) CD4<sup>+</sup>  
112 CD3<sup>+</sup> cells (CD4 T cells) and IL-17A<sup>+</sup> CD4 T cells, (c) CD8 $\alpha$ <sup>+</sup> CD3<sup>+</sup> cells (CD8 T cells)  
113 and IL-17A<sup>+</sup> CD8 T cells, and (d) NK1.1<sup>+</sup> CD3<sup>-</sup> cells (NK cells) and IL-17A<sup>+</sup> NK cells. (e)  
114 Purified human neutrophils were stimulated with *S. aureus* (MOI 10 or 20) or PBS for 12

115 hours and IL-17A level in supernatant were measured. (n= 5-6 mice/ *S. aureus* group, 3  
116 mice/PBS group). Data are representative of three independent experiments.

117 **Supplemental Figure 5. Deficiency of MLKL or IL-18, but not of IL-1 $\beta$ , augments the**  
118 **numbers of  $\gamma\delta$  T cells and IL-17A producing  $\gamma\delta$  T cells. (a-c) WT, *Mlkl*<sup>-/-</sup>, *Il-18*<sup>-/-</sup>, *Il-1 $\beta$* <sup>-/-</sup>**  
119 **, and *Nlr4*<sup>-/-</sup> mice were infected with *S. aureus* (5 x10<sup>7</sup> CFU/mouse) intratracheally. At**  
120 **24 hpi, lungs were harvested and processed for flow cytometric analysis. (a) Total  $\gamma\delta$  T**  
121 **cells and IL-17A producing  $\gamma\delta$  T cells in the lungs of WT, *Mlkl*<sup>-/-</sup>, and *Nlr4*<sup>-/-</sup> mice. (b)**  
122 **Total  $\gamma\delta$  T cells and IL-17A producing  $\gamma\delta$ -T cells in the lungs of WT, *Il-18*<sup>-/-</sup> and *Nlr4*<sup>-/-</sup>**  
123 **mice receiving recombinant murine IL-18 (1  $\mu$ g/mouse) or PBS 1 hour post-infection. (c)**  
124 **Total  $\gamma\delta$  T cells and IL-17A producing  $\gamma\delta$  T cells in the lungs of WT, *Il-1 $\beta$* <sup>-/-</sup>, and *Nlr4*<sup>-/-</sup>**  
125 **mice. (n= 5-6 *S. aureus* mice/group, 3 mice/PBS group). Data are representative of three**  
126 **independent experiments.**

127 **Supplemental Figure 6. Blockade of caspase-1 and RIP1 improve the outcome of *S.***  
128 ***aureus* pneumonia. (a-c) WT, *Casp1/11*<sup>-/-</sup> and *Nlr4*<sup>-/-</sup> mice were treated with Ac-yvad-**  
129 **cmk (150  $\mu$ g/mouse) or DMSO intraperitoneally 12 hours prior the infection with *S. aureus***  
130 **(5 x 10<sup>7</sup> CFU or 2 x10<sup>8</sup> CFU/mouse) intratracheally. (a) Bacterial burden in the lungs, (b)**  
131 **BALF at 24 hpi, and (c) survival over 100 hours were determined. (d-f) WT and *Nlr4*<sup>-/-</sup>**  
132 **mice were treated with Necrostatin-1 (300  $\mu$ g/mouse) or DMSO intraperitoneally 12 hours**  
133 **prior to infection with *S. aureus* (5 x10<sup>7</sup> CFU/mouse for pneumonia or 2 x 10<sup>8</sup> CFU/mouse)**  
134 **intratracheally. (d) Number of neutrophils, (e) bacterial burden in BALF at 24 hpi, and (f)**  
135 **survival over 100 hours were determined. (g-i) WT mice were treated with Rottlerin (PKC-**  
136  **$\delta$  inhibitor) (200  $\mu$ g/mouse) or DMSO intraperitoneally 12 hours prior to infection with *S.***  
137 ***aureus* (5 x10<sup>7</sup> CFU/mouse) intratracheally. (g) Level of IL-1 $\beta$ , (h) number of neutrophils,**

138 (i) bacterial burden in lungs and BALF at 24 hpi were determined. Data are representative  
139 of three independent experiments. Kaplan–Meier plots were used to show survival of mice  
140 from each group. Statistical significance was determined by one-way ANOVA (followed  
141 by Bonferroni’s *post hoc* comparisons (**a, b, d, e**), log-rank test (**c,f**), unpaired t-test (**g, h**),  
142 and Man-Whitney (**i**). \* $p < 0.05$ ; \*\* $p < 0.01$ ; \*\*\* $p < 0.001$ . (n= 4-6/group for pneumonia  
143 and n= 10/group for survival).  
144

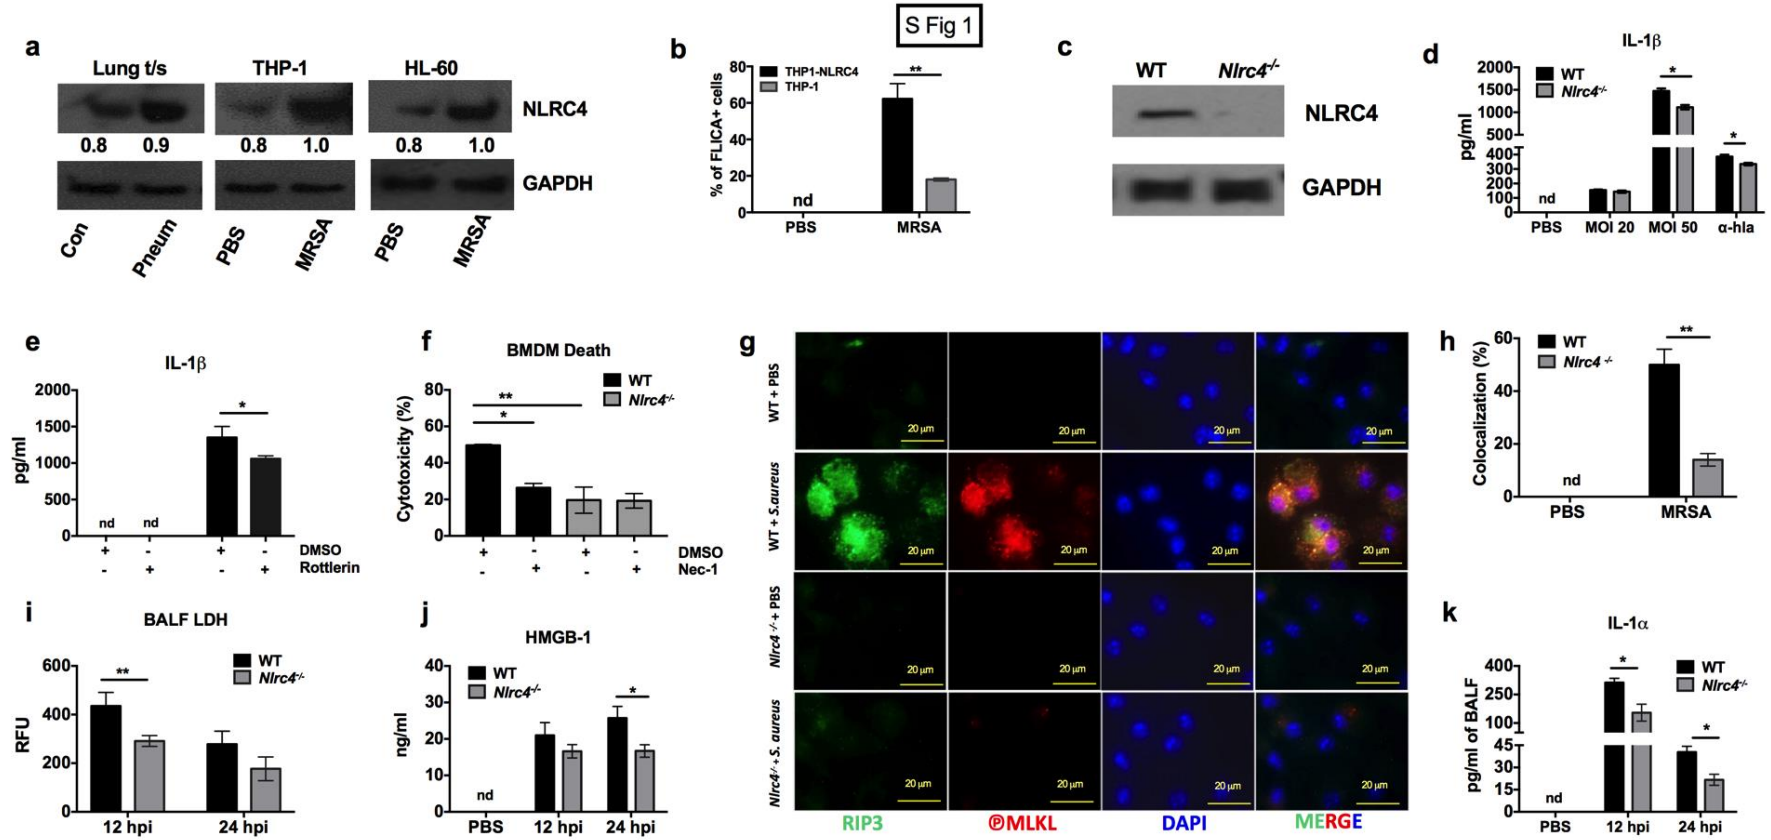



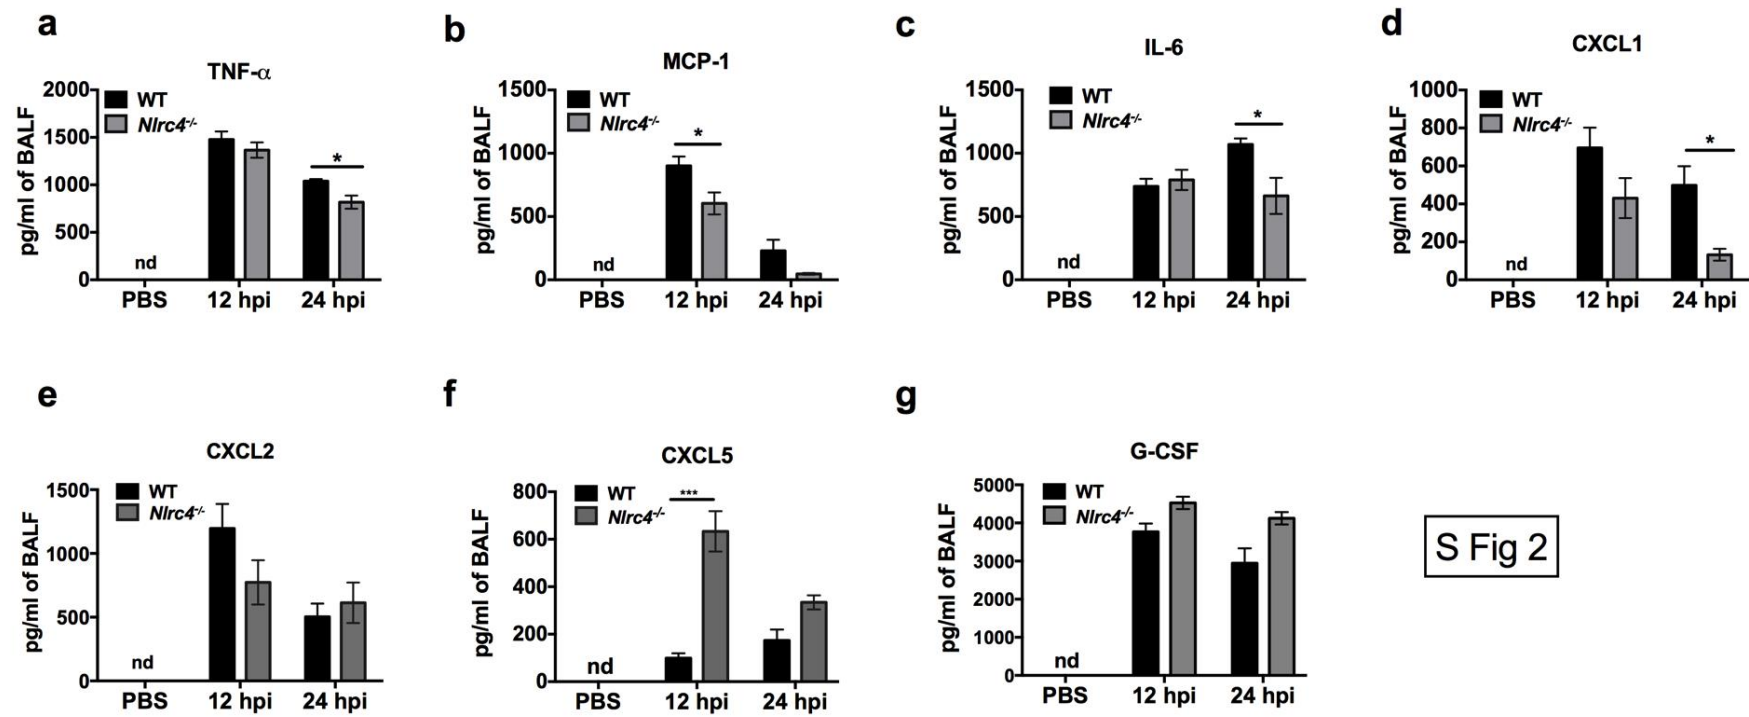

S Fig 2

S Fig 3

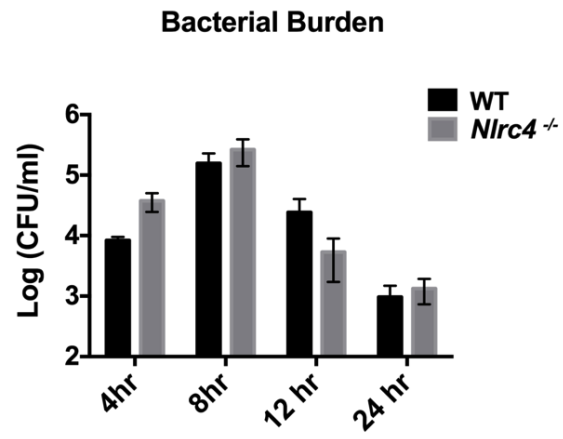

S Fig 4

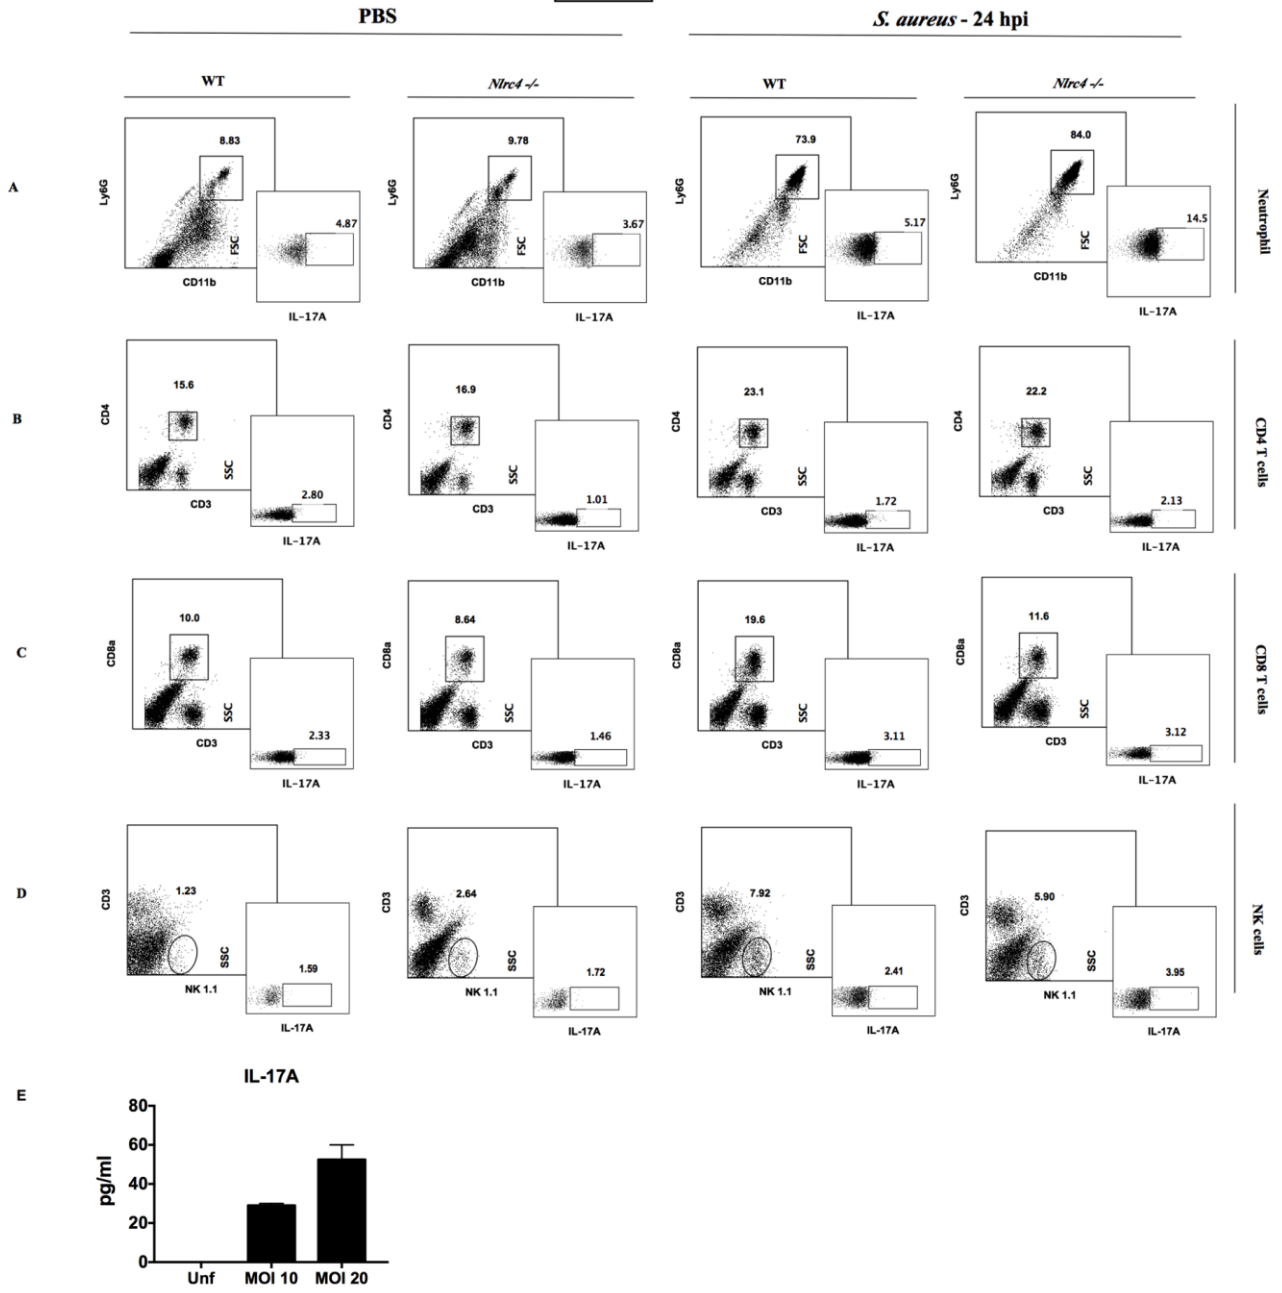

S Fig 5

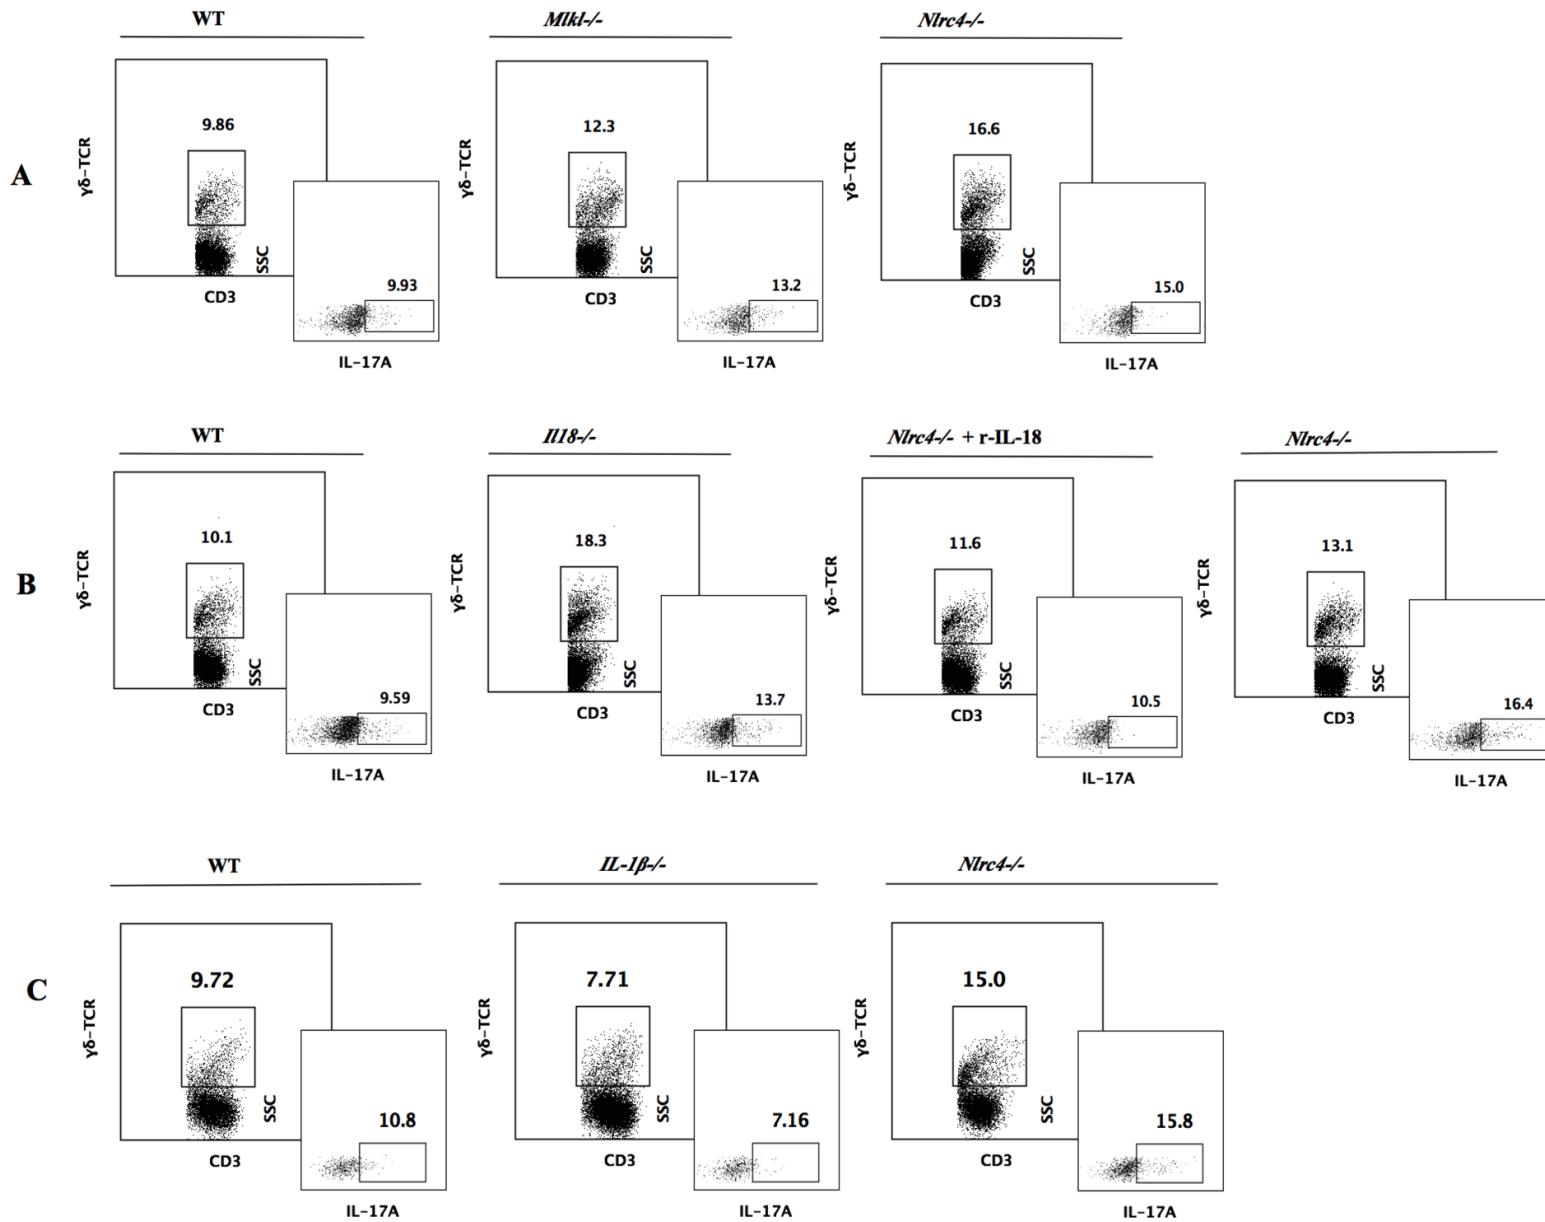

S Fig 6

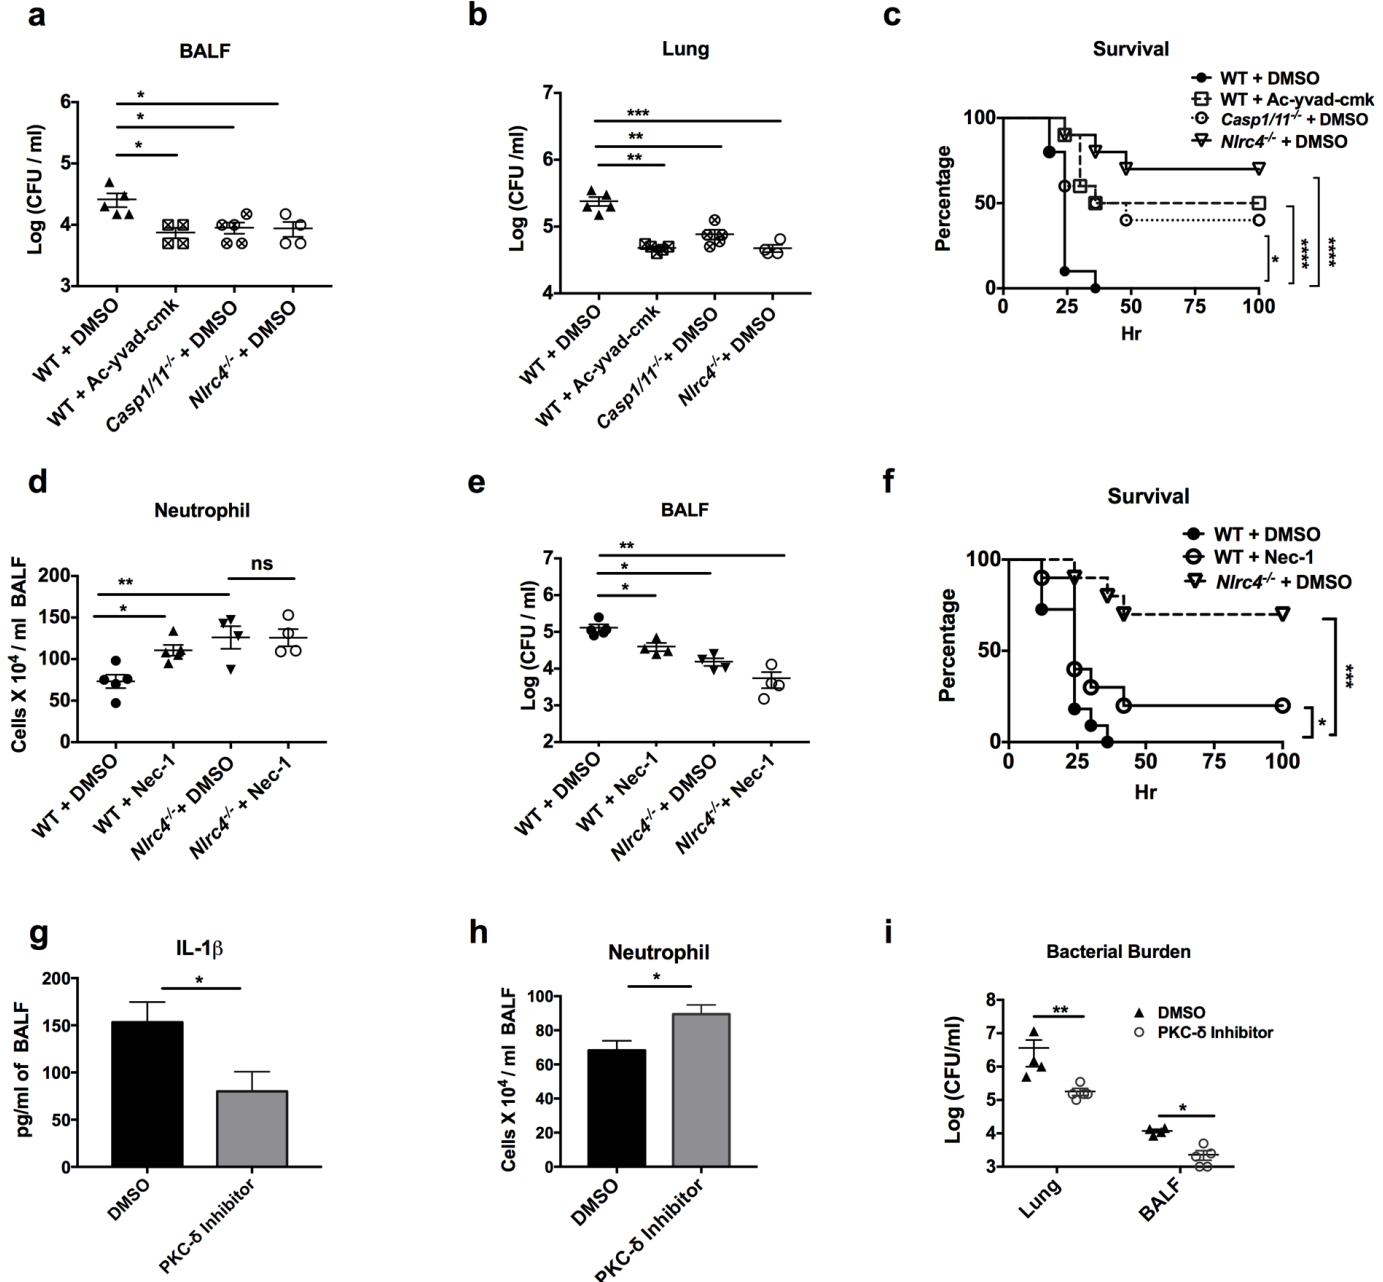

Supplement: NIHMS1506024-supplement-1.pdf [file NIHMS1506024-supplement-1.pdf]
